# Supplementary material for: Revisiting the donor screening protocol of faecal microbiota transplantation (FMT): a systematic review
Source: HighWire-hosted journal article supplement (doi:10.1136/gutjnl-2023-329515), 2023-05-04
Supplement: gutjnl-2023-329515supp001_data_supplement.pdf [file gutjnl-2023-329515supp001_data_supplement.pdf]

## **Supplementary Information**

### **Revisiting the donor screening protocol of fecal microbiota transplantation (FMT): A systematic review**

#### **Supplementary Materials and Methods**

##### **Protocol development**

This systematic review was carried out according to the Preferred Reporting Items for Systematic Reviews and Meta-Analysis PRISMA statement and the published International Platform of Registered Systematic Review and Meta-analysis Protocols (INPLASY) with registration number INPLASY2021120063.

##### **Search strategy**

A comprehensive search and systematic literature review were performed using 3 bibliographic databases namely, EMBASE and MEDLINE through PubMed and WEB of SCIENCE for the last decade, using the search terms, (“Faecal microbiota transplantation” OR “FMT” OR “bacteriotherapy” OR “gut microbiota transplantation” OR “fecal transplantation” OR “intestinal microbiota transfer”) along with the term “AND” separately with (“*Clostridioides difficile*” OR “*C. difficile*”), and (“Inflammatory bowel disease” OR “IBD” OR “Crohn’s disease” OR “Ulcerative colitis” OR “UC”). The same search term was used in all databases to retrieve the data for this review. Additionally, we have reviewed all international consensus documents and local guidelines published in English, on the topic of interest.

##### **Eligibility criteria**

The PICOS (Population, Intervention, Comparator, Outcomes, and Study Design) approach was used to guide the determination of the eligibility criteria.

**Population:** The current study intended to review three major adult population (> 18 years) categories (1) laboratory-confirmed diagnosis of *C. difficile* colitis (severe or complicated CDI), (2)  $\geq 2$  laboratory-confirmed relapses of *C. difficile* colitis after receipt of initial specific antimicrobial treatment, (3) Ulcerative colitis and inflammatory bowel disease was diagnosed based on clinical, endoscopic, and histological criteria

**Interventions:** Single or multiple FMT in patients/populations with the above underline medical conditions were included. All FMT administration routes were considered including; colonoscopy, oral gavage, naso-duodenal tube, and enema. The fresh, frozen or encapsulated samples that were used in FMT along with related or unrelated donors were also included where adequate information was disseminated in the donor screening procedure.

**Comparator:** Since this is a qualitative analysis and the primary objective is to analyze donor screening procedures, the presence of a comparator is not applicable.

**Outcomes:** Primary outcome of this review is to rationalize rigorous donor screening procedures suitable for the Western-Pacific region including assessing the optimal strategy to detect ESBL-producing bacteria due to their high prevalence rates in the region, including other MDROs.

**Study design:** The review included all types of observational (retrospective and prospective) and clinical (randomized control, interventional, cohorts, case reports, and case series studies) studies on FMT against aforementioned (*C. difficile*, UC, and IBD) gut-related diseases.

**Excluding criteria:** We excluded reviews, editorials, and letters to the editor or commentaries that did not provide precise and sufficient information for the donor screening analysis. Furthermore, the FMT applications for pediatric patients were also excluded due to the inability to compare the outcomes with the adult's stable gut microbiota. Non-English articles and FMT applications other than *C. difficile*, ulcerative colitis, and Inflammatory bowel disease were also excluded, as our research group already published a systematic review and meta-analysis for the application of FMT in AMR remission and lack of evidence for other applications of FMT. Additionally, we refrain from including the relevant articles already reviewed by Lai et al [Lai CY, Sung J, Cheng F, et al. Systematic review with Meta-analysis: Review of donor features, procedures and outcomes in 168 clinical studies of Faecal Microbiota Transplantation. *Aliment Pharmacol & Therapeutics* 2019;49:354–63. doi:10.1111/apt.15116], as this manuscript is an update and extension of the dynamically evolving donor screening procedures.

### **Assessment of risk of bias for the included studies**

Two reviewers (RN, and PD) independently assessed the eligibility of all articles and this was performed using the <https://www.covidence.org> online platform. The article selection process included two stages. At stage 1, the titles and abstracts were reviewed by one research staff (PD) and one supervisor (RN). At this stage, two reviewers met to discuss the uncertainties of the citations. Thereafter, the full-text articles were reviewed to judge the entitlement by two reviewers at stage 1 (PD and RN) and by a senior supervisor MI. Each study was read in full by each reviewer and assessed for inclusion. Full texts that did not fulfill the priori-defined inclusion criteria were excluded. Disagreements regarding inclusion in the final review were resolved through discussion with senior reviewer MI.

The quality of the randomized control trials, case series, cohorts, and case studies was assessed using the JBI critical appraisal checklist which looks at 13, 10, 11, and 8 critical aspects, respectively for the possibility of bias in its design, conduct, and analysis [Critical appraisal tools. JBI. <https://jbi.global/critical-appraisal-tools> (accessed 12 Nov2022)]. The studies with the selection “No” (Red color boxes) for at least 3 questions in the appraisal form were considered to pose a lack of integrity in the study design, hence excluded from data abstraction and reviewing. Decisions regarding study eligibility and quality were made by two reviewers, and any disagreements were resolved by discussion.

### **Data extraction**

Two researchers (RN and PD) developed an individual data abstraction spreadsheet using Excel version 2016 (Microsoft Corporation, Redmond, Washington, USA) and conducted the data abstraction for the included full-text articles and the consensus documents. After this, the data were independently assessed by the review authors. We gathered the following information: type of study, period, place of conduct, type of donor, donor screening timeline (where applicable), pre-screening questionnaire, and list of blood and stool tests.

Supplementary Table 1

| WHO Regions                                                                     | WPR       |                                                              |              |              | AMR              |                           | AMR/EUR               |                     | EUR                 |               | EUR/AMR/<br>WPR/SEA<br>R |                    |
|---------------------------------------------------------------------------------|-----------|--------------------------------------------------------------|--------------|--------------|------------------|---------------------------|-----------------------|---------------------|---------------------|---------------|--------------------------|--------------------|
|                                                                                 | Hong Kong | [Australian<br>Governmen<br>t, FMT<br>product<br>regulation] | [Lin et al.] | [Seo et al.] | [Chen et<br>al.] | [Government<br>of Canada] | [Cammarota<br>et al.] | [Mullish et<br>al.] | [Terveer et<br>al.] | [Kump et al.] | [Nakov et<br>al.]        | [Keller et<br>al.] |
| Risk of infectious agents                                                       |           |                                                              |              |              |                  |                           |                       |                     |                     |               |                          |                    |
| Known HIV, Hepatitis B,<br>or C infections                                      |           |                                                              |              | NS           | NS               |                           |                       |                     |                     |               |                          |                    |
| Known exposure to HIV or<br>viral hepatitis (within the<br>previous 12 months.) | NS        |                                                              | NS           | NS           |                  |                           | NS                    | NS                  |                     | NS            |                          | NS                 |
| High-risk sexual behaviors                                                      |           |                                                              |              |              |                  |                           |                       |                     | NS                  | NS            |                          |                    |
| Use of illicit drugs                                                            |           | NS                                                           |              | NS           | NS               |                           |                       |                     | NS                  |               |                          |                    |
| Tattoo or body piercing<br>within 6 months                                      | NS        |                                                              |              |              |                  |                           |                       |                     | NS                  | NS            |                          |                    |
| Incarceration or history of<br>incarceration                                    | NS        |                                                              |              |              | NS               |                           | NS                    | NS                  | NS                  | NS            | NS                       |                    |

|                                                                                           |    |    |    |    |    |  |    |    |    |    |    |    |
|-------------------------------------------------------------------------------------------|----|----|----|----|----|--|----|----|----|----|----|----|
| Known current communicable disease                                                        | NS | NS | NS | NS |    |  | NS | NS | NS |    | NS | NS |
| Risk factors for variant Creutzfeldt-Jakob disease                                        | NS | NS | NS | NS | NS |  | NS | NS | NS | NS | NS |    |
| Travel (within the last 6 months) to high-risk countries with travelers' diarrhea         |    |    |    |    |    |  |    |    |    | NS |    |    |
| Recent needle stick accident                                                              |    |    |    | NS | NS |  |    |    | NS | NS |    |    |
| Receiving blood products/transfusion                                                      | NS |    |    | NS | NS |  |    |    | NS | NS |    |    |
| Gastrointestinal co-morbidities                                                           |    |    |    |    |    |  |    |    |    |    |    |    |
| History of inflammatory bowel disease                                                     |    |    | NS | NS |    |  |    |    | NS |    | NS |    |
| History of irritable bowel syndrome, idiopathic chronic constipation, or chronic diarrhea |    |    | NS | NS |    |  |    |    | NS |    | NS |    |

|                                                                       |    |    |    |    |    |  |    |  |    |    |    |    |
|-----------------------------------------------------------------------|----|----|----|----|----|--|----|--|----|----|----|----|
| History of gastrointestinal malignancy or known polyposis             |    |    | NS |    |    |  |    |  |    |    |    |    |
| Factors could affect the composition of gut microbiota                |    |    |    |    |    |  |    |  |    |    |    |    |
| Antibiotics within the preceding 3 months                             |    |    |    |    |    |  |    |  |    |    |    |    |
| Major immunosuppressive medications                                   | NS |    |    |    |    |  |    |  | NS | NS |    | NS |
| Proton pump inhibitors                                                | NS |    |    | NS | NS |  |    |  | NS | NS | NS | NS |
| Other factors                                                         |    |    |    |    |    |  |    |  |    |    |    |    |
| History of major gastrointestinal surgery                             |    |    | NS |    |    |  | NS |  | NS |    |    |    |
| Metabolic syndrome                                                    |    |    |    |    |    |  |    |  |    |    |    |    |
| Systemic autoimmunity (multiple sclerosis, connective tissue disease) |    |    |    |    |    |  |    |  |    |    |    |    |
| Atopic conditions (Asthma, atopic dermatitis, Eczema)                 |    | NS |    |    |    |  | NS |  |    |    | NS |    |

|                                                  |    |    |    |    |    |  |    |    |    |    |    |    |
|--------------------------------------------------|----|----|----|----|----|--|----|----|----|----|----|----|
| Chronic pain syndromes                           | NS | NS |    |    |    |  | NS |    | NS |    | NS |    |
| diabetes (type I and II)                         | NS |    | NS | NS | NS |  |    |    | NS | NS | NS |    |
| obese                                            |    |    |    |    |    |  |    |    |    |    |    |    |
| Depression                                       |    | NS |    |    |    |  |    |    |    |    |    |    |
| Eating disorders (anorexia and bulimia)          | NS | NS | NS |    | NS |  | NS | NS | NS | NS | NS | NS |
| Schizophrenia or delusion disorder               |    | NS |    |    |    |  |    |    |    |    |    |    |
| Have you been pregnant? (Date of birth/abortion) | NS | NS | NS |    | NS |  | NS | NS | NS | NS |    |    |
| Vegetarian or specific diet                      | NS | NS | NS | NS |    |  | NS | NS | NS | NS | NS | NS |
| Autism                                           | NS | NS | NS |    |    |  | NS | NS |    | NS | NS | NS |

WHO regions: AMR (Regions of the Americas); SEAR (South-East Asian Region); EUR (European Region); WPR (Western Pacific Region); NS: Not stated

Footnote:

Australian Government, Department of Health and Aged care, Fecal microbiota transplant product regulation. <https://www.tga.gov.au/products/biologicals-blood-and-tissues-and-advanced-therapies/biologicals/faecal-microbiota-transplant-products-regulation> (accessed 14December 2022)

Lin T-C, Hung Y-P, Ko W-C, et al. Fecal microbiota transplantation for clostridium difficile infection in Taiwan: Establishment and implementation. Journal of Micro, Immunoy and Infec 2019;52:841–50. doi:10.1016/j.jmii.2019.08.009



Seo HS, Chin HS, Kim Y-H, et al. Laboratory aspects of donor screening for fecal microbiota transplantation at a Korean fecal microbiota bank. *Anna Labo Med* 2021;41:612–. doi:10.3343/alm.2021.41.6.612

Chen J, Zaman A, Ramakrishna B, et al. Stool banking for fecal microbiota transplantation: Methods and operations at a large stool bank. Published Online First: 2020. doi:10.1101/2020.09.03.20187583

Canada H. Government of Canada. Canada.ca. 2022.<https://www.canada.ca/en/health-canada/services/drugs-health-products/biologics-radiopharmaceuticals-genetic-therapies/applications-submissions/guidance-documents/regulation-fecal-microbiota-therapy-treatment-difficile-infections.html> (accessed 12 Oct2022).

Cammarota G, Ianiro G, Kelly CR, et al. International consensus conference on stool banking for faecal microbiota transplantation in clinical practice. *Gut* 2019;68:2111–21. doi:10.1136/gutjnl-2019-319548

Mullish BH, Quraishi MN, Segal JP, et al. The use of faecal microbiota transplant as treatment for recurrent or refractory clostridium difficileinfection and other potential indications: Joint British Society of Gastroenterology (BSG) and Healthcare Infection Society (HIS) guidelines. *Gut* 2018;67:1920–41. doi:10.1136/gutjnl-2018-316818

Terveer EM, van Beurden YH, Goorhuis A, et al. How to: Establish and run a stool bank. *Clin Micro and Infec* 2017;23:924–30. doi:10.1016/j.cmi.2017.05.015

Kump PK, Krause R, Allerberger F, Högenauer C. Faecal microbiota transplantation—the Austrian approach. *Clin Micro and Infec* 2014; 20:1106–11

Nakov R, Lyutakov I., Mitkova A, Geroва V, et al. Establishment of the first stool bank in an Eastern European country and the first series of successful fecal microbiota transplantations in Bulgaria. *Euro Rev for Med and Pharmacol Sci* 2021; 25: 390-396

Keller JJ, Ooijevaar RE, Hvas CL, Terveer EM, Lieberknecht SC, Högenauer C, Arkkila P, Sokol H, Gridnyev O, Mégraud F, et al. A standardised model for stool banking for faecal microbiota transplantation: A consensus report from a multidisciplinary UEG Working Group. *Uni Europ Gastroentero J* 2021; 9:229–47.

## Supplementary Table 2

| WHO regions                                                               | Region of America |                |                | European Region |                     |                  |                |                   |                  | Other regions |                |                  |                  |                   |                  |              |
|---------------------------------------------------------------------------|-------------------|----------------|----------------|-----------------|---------------------|------------------|----------------|-------------------|------------------|---------------|----------------|------------------|------------------|-------------------|------------------|--------------|
| References                                                                | [Staley et al.]   | [Jiang et al.] | [Lynch et al.] | [Hvas et al.]   | [Kachlíková et al.] | [McCuane et al.] | [Nowak et al.] | [Reigadas et al.] | [Reigada et al.] | [Rode et al.] | [Sokol et al.] | [Terveer et al.] | [Březina et al.] | [Costello et al.] | [Azimira et al.] | [Lee et al.] |
| Risk of infectious agents                                                 |                   |                |                |                 |                     |                  |                |                   |                  |               |                |                  |                  |                   |                  |              |
| Known HIV, Hepatitis B, or C infections                                   |                   | NS             | NS             | NS              | NS                  | NS               | NS             | NS                | NS               |               | NS             | NS               | NS               | NS                | NS               | NS           |
| Known exposure to HIV or viral hepatitis (within the previous 12 months.) |                   | NS             | NS             | NS              | NS                  | NS               | NS             | NS                | NS               |               | NS             | NS               | NS               | NS                | NS               | NS           |
| High-risk sexual behaviors                                                |                   |                | NS             |                 |                     |                  | NS             | NS                | NS               | 1             | NS             | NS               | NS               |                   |                  |              |
| Use of illicit drugs                                                      |                   | NS             | NS             | NS              | NS                  | NS               | NS             | NS                | NS               | NS            | NS             | NS               | NS               |                   |                  | NS           |
| Tattoo or body piercing within 6 months                                   |                   |                | NS             | NS              |                     | NS               | NS             | NS                | NS               |               | NS             | NS               | NS               | NS                |                  |              |

|                                                                                   |    |    |    |    |    |    |    |    |    |    |    |    |    |    |    |    |
|-----------------------------------------------------------------------------------|----|----|----|----|----|----|----|----|----|----|----|----|----|----|----|----|
| Incarceration or history of incarceration                                         |    | NS |    |    | NS |
| Known current communicable disease                                                |    | NS | 2  |    |    | NS |    |    | NS |
| Risk factors for variant Creutzfeldt-Jakob disease                                |    | NS | NS | NS | NS |    | NS | NS | NS | NS |    | NS | NS | NS |    | NS |
| Travel (within the last 6 months) to high-risk countries with travelers' diarrhea |    |    | NS |    |    | NS | NS | NS | NS | 3  | NS |    |    |    |    | NS |
| Recent needle stick accident                                                      | NS |    | NS | 4  | NS | NS | NS | NS | NS | NS |
| Receiving blood products/transfusion                                              | NS |    | NS |    | NS | NS | NS | NS | NS |    |    | NS | NS | NS | NS | NS |
| Use of illicit drugs                                                              | NS |    | NS |    |    |
| Have you or a household member had weekly or more frequent contact with           | NS |    | NS |    | NS | NS | NS | NS | NS | NS |

|                                                                                           |    |    |    |    |    |    |    |    |    |    |    |    |    |    |    |    |
|-------------------------------------------------------------------------------------------|----|----|----|----|----|----|----|----|----|----|----|----|----|----|----|----|
| live pigs in the last 6 months?                                                           |    |    |    |    |    |    |    |    |    |    |    |    |    |    |    |    |
| Gastrointestinal co-morbidities                                                           |    |    |    |    |    |    |    |    |    |    |    |    |    |    |    |    |
| History of inflammatory bowel disease                                                     |    |    |    |    |    |    | NS |    |    | NS |    |    | NS |    |    |    |
| History of irritable bowel syndrome, idiopathic chronic constipation, or chronic diarrhea |    |    |    |    |    |    | NS |    |    | NS |    |    | NS |    |    |    |
| History of gastrointestinal malignancy or known polyposis                                 |    |    |    |    |    |    | NS |    |    | NS |    |    | NS |    |    |    |
| Do you have 1–2 daily bowel movements?                                                    | NS |    | NS | NS | NS | NS | NS | NS |
| Is the consistency of your stool normal                                                   | NS |    | NS | NS | NS | NS | NS | NS |

|                                                        |  |    |    |    |    |    |    |    |    |    |    |    |    |    |    |    |
|--------------------------------------------------------|--|----|----|----|----|----|----|----|----|----|----|----|----|----|----|----|
| (smooth and shaped like a sausage)?                    |  |    |    |    |    |    |    |    |    |    |    |    |    |    |    |    |
| Factors could affect the composition of gut microbiota |  |    |    |    |    |    |    |    |    |    |    |    |    |    |    |    |
| Antibiotics within the preceding 3 months              |  | NS |    | 5  |    | NS | 6  | NS | NS | 7  | 8  | 9  |    |    |    | NS |
| Major immunosuppressive medications                    |  | NS | NS | 10 | NS | NS | NS | NS | NS | NS | 11 | NS | NS | NS | NS | NS |
| Systemic antineoplastic agents                         |  | NS |
| Proton pump inhibitors                                 |  | NS |    | NS | NS | NS |
| Other factors                                          |  |    |    |    |    |    |    |    |    |    |    |    |    |    |    |    |
| Allergies                                              |  | NS | NS |    | NS | NS | NS |    |    | NS |    |    | NS |    |    | NS |
| History of major gastrointestinal surgery              |  | NS |
| Metabolic syndrome                                     |  | NS | NS | NS |    | NS | NS |    |    | NS | NS |    | NS | NS |    | NS |

|                                                                                              |    |    |    |    |    |    |    |    |    |    |    |    |    |    |    |    |
|----------------------------------------------------------------------------------------------|----|----|----|----|----|----|----|----|----|----|----|----|----|----|----|----|
| Systemic autoimmunity (multiple sclerosis, connective tissue disease)                        |    | NS | NS | NS | 12 |    | NS |    |    | NS |    |    |    |    |    | NS |
| Atopic conditions (Asthma, atopic dermatitis, Eczema, eosinophils disorder)                  |    | NS | NS | NS | NS |    | NS |    |    | NS |    |    | NS |    |    | NS |
| Chronic pain syndromes                                                                       |    | NS | NS | 13 | NS |    | NS |    |    | NS |
| diabetes (type 1 and II)                                                                     |    | NS | NS |    |    |    | NS |    |    |    |
| obese with body mass index (BMI) >30                                                         | NS | NS | NS | 14 | NS | NS | NS | NS | NS | NS |    |    | NS |    |    |    |
| Depression                                                                                   | NS | NS | NS | NS | NS |    | NS |
| Cardiovascular conditions (high blood pressure, cholesterol, fasting glucose, heart disease) | NS | NS | NS | NS | NS |    | NS |

|                                                        |    |    |    |    |    |    |    |    |    |    |    |    |    |    |    |    |
|--------------------------------------------------------|----|----|----|----|----|----|----|----|----|----|----|----|----|----|----|----|
| Actively smoke                                         | NS |    | NS |
| Eating disorders<br>(anorexia and<br>bulimia)          | NS | NS | NS | NS | NS |    | NS |
| Schizophrenia or<br>delusion disorder                  | NS | NS | NS | NS | NS |    | NS |
| Have you been<br>pregnant? (Date of<br>birth/abortion) | NS |    |    | NS | NS | NS | NS | NS |
| Hemorrhoid disease                                     | NS |    | NS | NS | NS | NS | NS |
| History of typhoid<br>fever infection                  | NS |    | NS | NS | NS | NS | NS |
| Vegetarian or specific<br>diet                         | NS |    | NS | NS | NS | NS | NS |
| Autism                                                 | NS |    | NS |    | NS | NS |

<sup>1</sup>Have you ever had sexual contact with another man? (Question only for men); <sup>2</sup>Infectious disease including MRSA or close contact with MRSA infected patient; <sup>3</sup>Have you travel outside to Denmark, Scandinavia, and Germany?; <sup>4</sup>shared a syringe or needle with others?; <sup>5</sup>Antibacterials, antifungals or antivirals; <sup>6</sup>Antibiotic within preceding 2 months; <sup>7</sup>Antibiotics within the preceding 3 months; <sup>8</sup>Including viral infection (7 days before screening) /HSV and/or papillomavirus anal lesions; <sup>9</sup>Antibiotics within the preceding <6 months; <sup>10</sup>Any kind of medication including non-steroidal anti-inflammatory drugs; <sup>11</sup>Antifungal drugs too; <sup>12</sup>Systemic rheumatic diseases; <sup>13</sup>Any sort of chronic disease; <sup>14</sup>BMI >28 Kg/m<sup>2</sup>;

## Footnote:

Staley C, Halaweish H, Graiziger C, Hamilton MJ, Kabage AJ, Galdys AL, Vaughn BP, Vantanasiri K, Suryanarayanan R, Sadowsky MJ, et al. Lower endoscopic delivery of freeze-dried intestinal microbiota results in more rapid and efficient engraftment than oral administration. *Scient Repo*2021; 11

Jiang Z-D, Jenq RR, Ajami NJ, et al. Safety and preliminary efficacy of orally administered lyophilized fecal microbiota product compared with frozen product given by enema for recurrent clostridium difficile infection: A randomized clinical trial. *PLOS ONE* 2018;13. doi:10.1371/journal.pone.0205064

Lynch SM, Mu J, Grady JJ, Stevens RG, Devers TJ. Fecal microbiota transplantation for clostridium difficile infection: A one-center experience. *Digestive Dis* 2019; 37:467–72.

Hvas CL, Dahl Jørgensen SM, Jørgensen SP et al. Fecal Microbiota Transplantation Is Superior to Fidaxomicin for Treatment of Recurrent Clostridium difficile Infection. *Gastroenterology*. 2019 Apr;156(5):1324-1332.e3. doi: 10.1053/j.gastro.2018.12.01

Kachlíková M, Sabaka P, Koščálová A, et al. Comorbid status and the faecal microbial transplantation failure in treatment of recurrent clostridioides difficile infection – pilot prospective observational cohort study. *BMC Infec Dis* 2020;20. doi:10.1186/s12879-020-4773-x

McCune VL, Quraishi MN, Manzoor S, et al. Results from the first English stool bank using faecal microbiota transplant as a medicinal product for the treatment of Clostridioides difficile infection. *EClin Med*2020;20:100301. doi:10.1016/j.eclinm.2020.100301

Nowak A, Hedenstierna M, Ursing J, et al. Efficacy of routine fecal microbiota transplantation for treatment of recurrent clostridium difficile infection: A retrospective cohort study. *Inter J Micro* 2019;2019:1–7. doi:10.1155/2019/7395127

Reigadas E, Bouza E, Olmedo M, et al. Faecal microbiota transplantation for recurrent clostridioides difficile infection: Experience with lyophilized oral capsules. *J Hosp Inf* 2020;105:319–24. doi:10.1016/j.jhin.2019.12.022



Reigadas E, Olmedo M, Valerio M, Vázquez-Cuesta, S, et al.. Fecal microbiota transplantation for recurrent Clostridium difficile infection: Experience, protocol, and results. Official J for Spanish Society of Chemotherapy. 2018;31: 411-418.

Rode AA, Bytzer P, Pedersen OB, et al. Establishing a donor stool bank for faecal microbiota transplantation: Methods and feasibility. Euro J Clin Micro & Infec Dis 2019;38:1837–47. doi:10.1007/s10096-019-03615-x

Sokol H, Landman C, Seksik P, et al. Fecal microbiota transplantation to maintain remission in crohn’s disease: A pilot randomized controlled study. Microbiome 2020;8. doi:10.1186/s40168-020-0792-5

Terveer EM, Vendrik KEW, Ooijevaar RE, et al. Faecal microbiota transplantation for clostridioides difficile infection: Four years’ experience of the Netherlands donor feces bank. Un Europ Gastroentero JI 2020;8:1236–47. doi:10.1177/2050640620957765

Březina J, Bajer L, Wohl P, et al. Fecal microbial transplantation versus mesalamine enema for treatment of active left-sided ulcerative colitis—results of a randomized controlled trial. J ClinMed 2021;10:2753. doi:10.3390/jcm10132753

Costello SP, Hughes PA, Waters O, et al. Effect of fecal microbiota transplantation on 8-week remission in patients with ulcerative colitis. JAMA 2019;321:156. doi:10.1001/jama.2018.20046

Azimirad M, Yadegar A, Gholami F, Shahrokh S, et al.. treatment of recurrent clostridioides difficile infection using fecal microbiota transplantation in Iranian patients with underlying inflammatory bowel disease. J Inflamm Resh 2020; Volume 13:563–70.

Lee S, Drennan K, Simons G, Hepple A, Karlsson K, Lowman W, Gaylard PC, McNamara L, Fabian J. The ‘ins and outs’ of faecal microbiota transplant for recurrent clostridium difficile diarrhoea at wits donald gordon medical centre, Johannesburg, South Africa. South Afr Medl JI 2018; 108:403

Supplementary Table 3. National consensus (Laboratory tests)

| EUR | EUR/AMR | AMR | EUR/AMR/WPR | WPR | WPR |
|-----|---------|-----|-------------|-----|-----|
|-----|---------|-----|-------------|-----|-----|

| /SEAR                       |                  |                  |               |                |                    |               |                        |                 |           |                                      |              |              |
|-----------------------------|------------------|------------------|---------------|----------------|--------------------|---------------|------------------------|-----------------|-----------|--------------------------------------|--------------|--------------|
|                             | [Mullish et al.] | [Terveer et al.] | [Kump et al.] | [Nakov et al.] | [Cammarota et al.] | [Chen et al.] | [Government of Canada] | [Keller et al.] | Hong Kong | [Australian Government, FMT product] | [Lin et al.] | [Seo et al.] |
| Blood Tests                 |                  |                  |               |                |                    |               |                        |                 |           |                                      |              |              |
| Testing for viruses         |                  |                  |               |                |                    |               |                        |                 |           |                                      |              |              |
| Hepatitis A                 | 1                | 1                | 1             | 1              |                    | 1             | NS                     | 1               | 1         |                                      | 1            | 1            |
| Hepatitis B                 | 2, 2a            | 2, 2a            | 2a            | 2a             |                    | 2a, 2b        |                        | 2               | 2, 2a     | 2c                                   | 2, 2a, 2b    | 2            |
| Hepatitis C                 | 3                | 3                | 3             | 3              |                    | 3             |                        | 3               | 3         | 3a                                   | 3            | 3            |
| Hepatitis E                 | 4                | 4                | NS            | 4              |                    | NS            | NS                     |                 | 4         | NS                                   | NS           | NS           |
| HIV I and II                |                  |                  |               |                |                    |               |                        |                 |           |                                      |              |              |
| Human T-cell lymphoma virus | NS               |                  | NS            | NS             | NS                 |               |                        | NS              |           |                                      |              | NS           |
| Cytomegalovirus (CMV)       | 5*               | 5a               | *             |                | NS                 | NS            | NS                     |                 | NS        | NS                                   | 5a           |              |
| Epstein-Barr virus          | *                |                  | NS            |                | NS                 | NS            | NS                     | NS              | NS        | NS                                   |              |              |
| Testing for bacteria        |                  |                  |               |                |                    |               |                        |                 |           |                                      |              |              |
| Treponema pallidum          |                  |                  |               |                |                    | 6             |                        |                 |           |                                      | 6            | 6            |
| Test for parasites          |                  |                  |               |                |                    |               |                        |                 |           |                                      |              |              |
| Entamoeba histolytica,      |                  | NS               | NS            | NS             | NS                 |               | NS                     | NS              | NS        | NS                                   |              | NS           |
| Toxoplasma gondii           | NS               | NS               | NS            | NS             | NS                 | NS            | NS                     | NS              | NS        | NS                                   |              | NS           |

|                                   |    |       |    |    |    |    |    |    |    |    |    |    |
|-----------------------------------|----|-------|----|----|----|----|----|----|----|----|----|----|
| Strongyloides<br>stercoralis      |    |       | NS | NS |    |    | NS | NS | NS |    | NS | NS |
| Other testes                      |    |       |    |    |    |    |    |    |    |    |    |    |
| Complete blood count              |    | NS    | NS |    |    |    | NS |    |    |    |    |    |
| C-reactive proteins               |    | NS    | NS |    | NS | NS | NS |    |    |    |    |    |
| Erythrocyte<br>sedimentation rate |    | NS    | NS |    | NS | NS | NS | NS |    | NS |    |    |
| Renal function test               |    | NS    | NS |    |    | NS | NS |    |    | NS |    |    |
| Liver function test               |    | NS    | NS |    |    |    | NS |    |    |    |    |    |
| Stool tests                       |    |       |    |    |    |    |    |    |    |    |    |    |
| Testing for viruses               |    |       |    |    |    |    |    |    |    |    |    |    |
| Rotavirus                         |    |       |    |    |    |    |    |    |    |    |    |    |
| Norovirus                         | 7  | 7     | 7  |    |    | 7  |    | 7  | 7  |    | 7  | 7  |
| Adenovirus                        | NS |       | NS |    |    |    |    | NS | NS | NS |    |    |
| Astrovirus                        | NS |       | NS |    | NS |    |
| Sapovirus                         | NS |       | NS |
| Enterovirus                       | NS |       | NS |    | NS |
| Parechovirus                      | NS |       | NS |    | NS |
| Testing for bacteria              |    |       |    |    |    |    |    |    |    |    |    |    |
| Salmonella spp                    | 8  | 8, 8a | 8  | 8  | 8  | 8  | 8  | 8  | 8  | 8  | 8  | 8a |
| Shigella spp                      | 9  | 9, 9a | 9  | 9  | 9  | 9  | 9  | 9  | 9  | 9  | 9  | 9a |
| Yersinia spp                      |    |       |    |    |    | NS |    |    | NS | NS |    |    |

|                                                   |    |         |    |    |    |    |    |    |    |    |    |     |
|---------------------------------------------------|----|---------|----|----|----|----|----|----|----|----|----|-----|
| Campylobacter spp                                 | 10 | 10, 10a | 10 | 10 | 10 | 10 | 10 | 10 | 10 | 10 | 10 | 10a |
| Vibrio species                                    | NS | NS      | NS | NS |    |    |    |    |    | NS |    |     |
| C. difficile                                      | 11 | 11      |    |    |    |    | NS |    |    | 11 |    | NS  |
| H. pylori                                         | 12 | 12      | NS |    |    |    |    |    |    | 12 |    | 12a |
| Aeromonas spp.,                                   | NS |         | NS | NS | NS |    |    | NS | NS | NS | NS |     |
| E.coli 0157 (Shiga toxin-producing E. coli (STEC) | NS | NS      | NS | NS | NS |    |    | NS |    | NS | NS | NS  |
| Verotoxin-producing/Shiga toxin-producing E. coli |    |         | NS |    |    |    |    |    | NS | NS | NS | NS  |
| MDR Bacteria                                      |    |         |    |    |    |    |    |    |    |    |    |     |
| ESBL producing Enterobacteriaceae                 |    |         | NS |    |    |    |    |    |    |    | NS |     |
| VRE                                               | ** | **      | NS |    |    |    |    |    |    |    |    |     |
| CPE (CRE/KPC/NDM,OXA 48)                          |    | **      | NS |    |    |    |    |    |    |    |    |     |
| MRSA                                              | ** | **      | NS |    |    | NS |    |    |    |    | NS |     |
| MDR A. baumannii                                  | NS | NS      | NS | NS | NS | NS | NS | NS |    | NS | NS | NS  |
| aminoglycoside and quinolone resistant            | NS | NS      | NS | NS | NS | NS | NS | NS | NS | NS | NS | NS  |

Enterobacterales

|                                     |    |        |    |    |    |     |    |    |    |    |    |     |
|-------------------------------------|----|--------|----|----|----|-----|----|----|----|----|----|-----|
| Testing for parasites               |    |        |    |    |    |     |    |    |    |    |    |     |
| Cyclospora                          | 13 | NS     | NS |    | NS |     | NS |    | 13 | NS | NS | NS  |
| Isospora                            |    | NS     | NS |    |    |     | NS | 14 |    | NS | NS | NS  |
| Giardia spp                         | 15 | 15b*** | 15 |    |    | 15a | NS |    | 15 |    |    | 15b |
| Cryptosporidium spp                 |    | 16***  |    |    |    |     | NS |    |    |    | NS | 16  |
| Strongyloides                       | NS | ***    | NS | NS | NS | NS  | NS | 17 | NS | NS | NS | 17  |
| Microsporidium spp,                 |    | ***    | NS |    |    |     | NS | NS |    | NS | NS | NS  |
| Entamoeba histolytica               | NS |        | NS |    | NS | NS  | NS |    |    |    |    |     |
| Llight microscopy for<br>ova, cysts |    |        |    | NS |    |     |    | NS |    | NS |    | NS  |
| Other tests                         |    |        |    |    |    |     |    |    |    |    |    |     |
| Feacal occult blood<br>testing      | NS | NS     | NS | NS | NS | NS  | NS | NS |    | NS | NS |     |
| Calprotectin                        | NS | NS     | NS |    | NS | NS  | NS | NS | NS | NS | NS | NS  |

<sup>1</sup>IgM immunoassay; <sup>2</sup>Hepatitis B surface antigen test; <sup>2a</sup>Hepatitis B core antibody test; <sup>2b</sup>Hepatitis B antibody; <sup>2c</sup>Nucleic acid amplification test; <sup>3</sup>Anti hepatitis C immunoassay; <sup>3a</sup>Nucleic acid amplification test; <sup>4</sup>IgM immunoassay; <sup>5</sup>CMV IgG and IgM; <sup>5a</sup>CMV IgM only; <sup>6</sup>Rapid plasma regain test; <sup>7</sup>PCR; <sup>8</sup>Culture; <sup>8a</sup>Salmonella PCR; <sup>9</sup>Culture; <sup>9a</sup> Shigella PCR; <sup>10</sup>Culture; <sup>10a</sup>Campylobacter PCR; <sup>11</sup>PCR; <sup>12</sup>Stool antigen test, <sup>12a</sup>nested PCR; <sup>13,14</sup>Acid fast staining; <sup>15</sup>Fecal Giardia antigen; <sup>15a</sup>Enzyme immunoassay; <sup>15b</sup> PCR; <sup>16</sup> PCR; <sup>17</sup>Strongyloides ELISA.

\*Immunocompromised only

\*\* optional, based on risk assessment

\*\*\* if travel history to Middle and South America, Africa, or Asia

\*\*\*\* recommended for indication of IBD

WHO regions: AMR (Regions of the Americas); SEAR (South-East Asian Region); EUR (European Region); WPR (Western Pacific Region)

Footnote:

Australian Government, Department of Health and Aged care, Fecal microbiota transplant product regulation. <https://www.tga.gov.au/products/biologicals-blood-and-tissues-and-advanced-therapies/biologicals/faecal-microbiota-transplant-products-regulation> (accessed 14December 2022)

Lin T-C, Hung Y-P, Ko W-C, et al. Fecal microbiota transplantation for clostridium difficile infection in Taiwan: Establishment and implementation. *Journal of Micro, Immunoy and Infec* 2019;52:841–50. doi:10.1016/j.jmii.2019.08.009

Seo HS, Chin HS, Kim Y-H, et al. Laboratory aspects of donor screening for fecal microbiota transplantation at a Korean fecal microbiota bank. *Anna Labo Med* 2021;41:612–. doi:10.3343/alm.2021.41.6.612

Chen J, Zaman A, Ramakrishna B, et al. Stool banking for fecal microbiota transplantation: Methods and operations at a large stool bank. Published Online First: 2020. doi:10.1101/2020.09.03.20187583

Canada H. Government of Canada. Canada.ca. 2022.<https://www.canada.ca/en/health-canada/services/drugs-health-products/biologics-radiopharmaceuticals-genetic-therapies/applications-submissions/guidance-documents/regulation-fecal-microbiota-therapy-treatment-difficile-infections.html> (accessed 12 Oct2022).

Cammarota G, Ianiro G, Kelly CR, et al. International consensus conference on stool banking for faecal microbiota transplantation in clinical practice. *Gut* 2019;68:2111–21. doi:10.1136/gutjnl-2019-319548

Mullish BH, Quraishi MN, Segal JP, et al. The use of faecal microbiota transplant as treatment for recurrent or refractory clostridium difficileinfection and other potential indications: Joint British Society of Gastroenterology (BSG) and Healthcare Infection Society (HIS) guidelines. *Gut* 2018;67:1920–41. doi:10.1136/gutjnl-2018-316818

Terveer EM, van Beurden YH, Goorhuis A, et al. How to: Establish and run a stool bank. Clin Micro and Infec 2017;23:924–30. doi:10.1016/j.cmi.2017.05.015

Kump PK, Krause R, Allerberger F, Högenauer C. Faecal microbiota transplantation—the Austrian approach. Clin Micro and Infec 2014; 20:1106–11

Nakov R, Lyutakov I., Mitkova A, Gerova V, et al. Establishment of the first stool bank in an Eastern European country and the first series of successful fecal microbiota transplantations in Bulgaria. Euro Rev for Med and Pharmacol Sci 2021; 25: 390-396

Keller JJ, Ooijselaar RE, Hvas CL, Terveer EM, Lieberknecht SC, Högenauer C, Arkkila P, Sokol H, Gridnyev O, Mégraud F, et al. A standardised model for stool banking for faecal microbiota transplantation: A consensus report from a multidisciplinary UEG Working Group. Uni Europ Gastroentero J 2021; 9:229–47.

Supplementary Table 4: WHO region of the Americas

|                     | [Aas et al.] | [Jiang et al.] | [Lynch et al.] | [Walton et al.] | [Staley et al.] | [Dubberke et al.] | [Espinoza et al.] | [González et al.] |
|---------------------|--------------|----------------|----------------|-----------------|-----------------|-------------------|-------------------|-------------------|
| Time period         | 1994-2002    | NS             | 2012-2017      | NS              | 2018-2019       | 2014-2015         | NS                | NS                |
| Type of Study       | CS           | RCT            | CS             | CS              | CS              | RCT               | CSt               | RCT               |
| Country             | USA          | USA            | USA            | USA             | USA             | Canada            | Chile             | Mexico            |
| Donor               | R and UR     | NS             | NS             | NS              | NS              | NS                | NS                | NS                |
| GI disorder         | C. difficile | NS             | NS             | NS              | NS              | C. difficile      | NS                | NS                |
| Blood Tests         |              |                |                |                 |                 |                   |                   |                   |
| Testing for viruses |              |                |                |                 |                 |                   |                   |                   |
| Hepatitis A         | 1            | 1, 1a          |                |                 |                 |                   | 1                 | NS                |
| Hepatitis B         | 2, 2a        | 2, 2a          |                |                 |                 |                   | 2, 2a             | NS                |

|                                             |    |    |    |    |    |    |    |    |
|---------------------------------------------|----|----|----|----|----|----|----|----|
| Hepatitis C                                 | 3  | 3a |    |    | NS |    | 3a | NS |
| HIV I and II                                | 4  | 4a |    |    |    |    | 4a | NS |
| Cytomegalovirus (CMV)                       | NS | 6  | NS | NS | NS | NS | 6  | NS |
| Epstein-Barr virus                          | NS | 7  | NS | NS | NS | NS | 7  | NS |
| Human T-cell lymphoma virus antibody (HTLV) | NS | 8  | NS | NS | NS | NS | 8  | NS |
| Testing for bacteria                        |    |    |    |    |    |    |    |    |
| Treponema pallidum (Syphilis)               |    |    |    | NS |    | NS | NS | NS |
| Testing for parasites                       |    |    |    |    |    |    |    |    |
| Entamoeba histolytica                       | NS | 17 | NS | NS | NS | NS | NS | NS |
| Strongyloides stercoralis                   | NS | 18 | NS | NS | NS | NS | NS | NS |
| Other testes                                |    |    |    |    |    |    |    |    |



|                                |    |       |    |    |    |    |    |    |
|--------------------------------|----|-------|----|----|----|----|----|----|
| Complete blood count           | NS | NS    | NS | NS | NS | NS | NS |    |
| Liver enzymes                  | NS | NS    | NS | NS | NS | NS | NS |    |
| stool tests                    |    |       |    |    |    |    |    |    |
| Testing for viruses            |    |       |    |    |    |    |    |    |
| Norovirus                      | NS | NS    | NS | NS | NS |    | NS | NS |
| Adenovirus                     | NS | NS    | NS | NS | NS |    | NS | NS |
| Rotavirus                      | NS | NS    | NS | NS | NS |    | NS | NS |
| Testing for bacteria           |    |       |    |    |    |    |    |    |
| Salmonella spp                 | NS |       | NS |    |    |    | NS | NS |
| Shigella spp                   | NS |       | NS |    |    |    | NS | NS |
| Yersinia spp                   | NS |       | NS |    |    |    | NS | NS |
| Campylobacter spp              | NS |       | NS |    |    |    | NS | NS |
| C. difficile                   | NS | 9, 9a |    |    |    |    |    | NS |
| Helicobacter pylori            | NS |       | NS | NS |    | NS |    | NS |
| Vibrio species                 | NS | NS    | NS |    | NS |    | NS | NS |
| E. coli 0157 (Shiga like toxin | NS | NS    | NS |    | NS | NS | NS | NS |

|                                                            |    |    |    |    |    |    |    |    |
|------------------------------------------------------------|----|----|----|----|----|----|----|----|
| producing <i>E. coli</i> )                                 |    |    |    |    |    |    |    |    |
| <i>Listeria monocytogenes</i>                              | NS | NS | NS | NS | NS |    | NS | NS |
| Test for parasites                                         |    | *  |    |    |    |    |    |    |
| Cyclospora spp                                             | NS | NS | NS | NS |    | NS | NS | NS |
| Isospora                                                   | NS | NS | NS | NS |    | NS | NS | NS |
| Giardia spp                                                | NS | NS | NS | NS |    | NS |    | NS |
| Cryptosporidium parvum                                     | NS | NS | NS | NS |    | NS | NS | NS |
| light microscopy for presence of ova, cysts, and parasites |    | NS |    |    |    | NS |    | NS |

<sup>1</sup>IgM immunoassay; <sup>1a</sup>Total antibody; <sup>2</sup>Hepatitis B surface antigen test; <sup>2a</sup>Hepatitis B core antigen test; <sup>3</sup>Anti hepatitis C immunoassay; <sup>3a</sup>Nucleic acid amplification test; <sup>4</sup>IgM immunoassay; <sup>4a</sup>IgG immunoassay; <sup>6</sup>HTCV I and II antibodies; <sup>7</sup>CMV IgG and IgM; <sup>8</sup>Viral capsid antigen (VCA IgM); <sup>9</sup>Presence of toxins and antigens; <sup>9a</sup>Culture and PCR

NS: Not stated; CS: Case series; RCT: Randomized control trial; Cst: Case studies

Footnote:

Aas J, Gessert CE, Bakken JS et al. Recurrent Clostridium difficile colitis: case series involving 18 patients treated with donor stool administered via a nasogastric tube. Clin Infect Dis. 2003 Mar 1;36(5):580-5. doi: 10.1086/367657. Epub 2003 Feb 14.

Jiang Z-D, Jenq RR, Ajami NJ, et al. Safety and preliminary efficacy of orally administered lyophilized fecal microbiota product compared with frozen product given by enema for recurrent clostridium difficile infection: A randomized clinical trial. PLOS ONE 2018;13. doi:10.1371/journal.pone.0205064

Lynch SM, Mu J, Grady JJ, Stevens RG, Devers TJ. Fecal microbiota transplantation for clostridium difficile infection: A one-center experience. Digestive Dis 2019; 37:467–72.

Walton J, Burns D, Gaehle KE. Process and outcome of fecal microbiota transplants in patients with recurrent clostridium difficile infection. Gastroenteroy Nurs 2017;40:411–9. doi:10.1097/sga.0000000000000233

Staley C, Halaweish H, Graiziger C, Hamilton MJ, Kabage AJ, Galdys AL, Vaughn BP, Vantanasiri K, Suryanarayanan R, Sadowsky MJ, et al. Lower endoscopic delivery of freeze-dried intestinal microbiota results in more rapid and efficient engraftment than oral administration. Scient Repo2021; 11.

Dubberke ER, Lee CH, Orenstein R, Khanna S, Hecht G, Gerding DN. Results from a randomized, placebo-controlled clinical trial of a RBX2660—a microbiota-based drug for the prevention of recurrent Clostridium difficile infection. Clin Infec Dis 2018; 67:1198–204.

Espinoza R, Quera R, Meyer L, Rivera D. Fecal microbiota transplantation: first case report in Chile and review. Chile J infecto 2014;31:4.

Garza-González E, Mendoza-Olazarán S, Morfin-Otero R, Ramírez-Fontes A, Rodríguez-Zulueta P, Flores-Treviño S, Bocanegra-Ibarias P, Maldonado-Garza H, Camacho-Ortiz A. Intestinal microbiome changes in fecal microbiota transplant (fmt) vs. fmt enriched with lactobacillus in the treatment of recurrent clostridioides difficile infection. Canad J Gastroentero and Hepato 2019; 2019:1–7.

|                                                    | [Barberio et al.] | [Hvas et al.] | [Jitsumura et al.] | [Kachliková et al.] | [Wierzbicka et al.] | [McCune et al.] | [Nowak et al.] | Reigadas et al.] | Reigadas et al.] | Rode et al.] | [Rossen et al.] | [Sokol et al.] | [Tervveer et al.] | [Brezina et al.] |
|----------------------------------------------------|-------------------|---------------|--------------------|---------------------|---------------------|-----------------|----------------|------------------|------------------|--------------|-----------------|----------------|-------------------|------------------|
| <b>Time period</b>                                 | 2016-2019         | 2016-2018     |                    | 2017-2019           | 2018-2019           |                 | 2013-2017      | NS               | 2014-2017        | NS           | NS              | 2014-2017      | 2016-2019         |                  |
| <b>Type of study</b>                               | POS               | RCT           | RCT                | POS                 | CT                  | CT              | CoS            | CS               | CT               | CT           | RCT             | RCT            | OS                | RCT              |
| <b>Country</b>                                     | Italy             | Denmark       | UK                 | Slovakia            | Poland              | UK              | Sweden         | Spain            | Spain            | Denmark      | Netherlands     | France         | Netherlands       | Czech            |
| <b>Donor</b>                                       | UR                |               | UR                 | UR                  | UR                  | NS              | R              | NS               | NS               | NS           | R-              | UR             | UR                | UR               |
| <b>GI disorder</b>                                 | Cd                | Cd            | UC                 | Cd                  | UC                  | NS              | NS             | NS               | NS               | NS           | UC              | CD             | Cd                | UC               |
| <b>Blood Tests</b>                                 |                   |               |                    |                     |                     |                 |                |                  |                  |              |                 |                |                   |                  |
| <b>Testing for</b>                                 |                   |               |                    |                     |                     |                 |                |                  |                  |              |                 |                |                   |                  |
| <b>Hepatitis A</b>                                 |                   | NS            |                    |                     | 1                   |                 | NS             |                  |                  | 1            |                 |                | 1a                |                  |
| <b>Hepatitis B</b>                                 |                   |               |                    |                     | 2, 2a               |                 |                |                  |                  | 2, 2a, 2b    |                 |                | 2, 2a             |                  |
| <b>Hepatitis C</b>                                 |                   |               |                    |                     | 3                   | 3               |                |                  |                  | 3, 3a        |                 |                | 3                 |                  |
| <b>Hepatitis E</b>                                 |                   |               | NS                 | NS                  | NS                  | 4               | NS             | NS               | NS               | NS           | NS              | NS             | NS                | NS               |
| <b>HIV I and II</b>                                |                   |               |                    |                     |                     | 5               |                |                  |                  | 5a           |                 |                |                   |                  |
| <b>Human T-cell lymphoma virus antibody (HTLV)</b> |                   | NS            |                    | NS                  | NS                  | 6               | NS             |                  |                  | NS           | NS              |                |                   | NS               |
| <b>Cytomegalovirus (CMV)</b>                       |                   |               |                    |                     |                     |                 | NS             | NS               |                  |              |                 |                |                   |                  |

Supplementary Table 5: WHO European region

|                             | [Barberio et al.] | [Hvas et al.] | [Jitsumura et al.] | [Kachliková et al.] | [Wierzbicka et al.] | [McCune et al.] | [Nowak et al.] | [Reigadas et al.] | [Reigadas et al.] | Rode et al.] | [Rossen et al.] | Sokol et al.] | [Tervveer et al.] | [Brezina et al.] |
|-----------------------------|-------------------|---------------|--------------------|---------------------|---------------------|-----------------|----------------|-------------------|-------------------|--------------|-----------------|---------------|-------------------|------------------|
| <b>Epstein-Barr virus</b>   |                   |               |                    |                     |                     | NS              | NS             | NS                |                   | NS           | NS              | NS            |                   |                  |
| <b>Testing for bacteria</b> |                   |               |                    |                     |                     |                 |                |                   |                   |              |                 |               |                   |                  |
| NS                          |                   | NS            | NS                 |                     |                     | NS              | NS             | NS                | NS                | NS           | NS              | NS            | NS                | NS               |
| <b>Treponema pallidum</b>   |                   | NS            |                    |                     |                     |                 |                |                   |                   | 7. 7a        |                 |               |                   |                  |
| <b>Test for parasites</b>   |                   |               |                    |                     |                     |                 |                |                   |                   |              |                 |               |                   |                  |
| <i>E. histolytica</i>       |                   |               |                    | 8                   | NS                  | NS              | NS             | NS                | NS                | NS           | NS              | NS            | NS                | NS               |
| <i>T. gondii</i>            |                   | NS            | NS                 |                     | NS                  | NS              | NS             | NS                | NS                | NS           | NS              |               | NS                | NS               |
| <i>T. canis</i>             |                   | NS            | NS                 | 9                   | NS                  | NS              | NS             | NS                | NS                | NS           | NS              | NS            | NS                | NS               |
| <i>cati and suis</i>        |                   | NS            | NS                 | 10                  | NS                  | NS              | NS             | NS                | NS                | NS           | NS              | NS            | NS                | NS               |
| <i>S. stercoralis</i>       |                   | NS            | NS                 | NS                  | NS                  | NS              | NS             | NS                | NS                | NS           | NS              | NS            | NS                | NS               |
| <i>T. spiralis</i>          |                   | NS            | NS                 | NS                  | NS                  | NS              | NS             | NS                | NS                | NS           | NS              |               | NS                | NS               |
| <b>Other testes</b>         |                   |               |                    |                     |                     |                 |                |                   |                   |              |                 |               |                   |                  |
| <b>Complete blood count</b> |                   |               |                    | NS                  | NS                  | NS              | NS             | NS                | NS                | NS           | NS              | NS            | NS                | NS               |
| <b>C-reactive proteins</b>  |                   |               |                    | NS                  | NS                  | NS              | NS             | NS                | NS                | NS           | NS              | NS            | NS                | NS               |

|                                             | [Barber<br>io et<br>al.] | [Hvas<br>et al.] | [Jitsum<br>ura et<br>al.] | [Kachlik<br>ová et<br>al.] | [Wierzb<br>icka et<br>al.] | [McCu<br>ne et<br>al.] | [Now<br>ak et<br>al.] | [Reig<br>adas<br>et al.] | [Reigad<br>as et al.] | Rode et<br>al.] | [Ross<br>en et<br>al.] | Sokol<br>et al.] | [Terveer et<br>al.] | [Brezina et<br>al.] |
|---------------------------------------------|--------------------------|------------------|---------------------------|----------------------------|----------------------------|------------------------|-----------------------|--------------------------|-----------------------|-----------------|------------------------|------------------|---------------------|---------------------|
| <b>Erythrocyte sedimentation rate (ESR)</b> |                          | NS               |                           | NS                         | NS                         | NS                     | NS                    | NS                       | NS                    | NS              | NS                     | NS               | NS                  | NS                  |
| <b>Albumin</b>                              |                          | NS               |                           | NS                         | NS                         | NS                     | NS                    | NS                       | NS                    | NS              | NS                     | NS               | NS                  | NS                  |
| <b>Renal function test</b>                  |                          |                  |                           | NS                         | NS                         | NS                     | NS                    | NS                       | NS                    | NS              | NS                     | NS               | NS                  | NS                  |
| <b>Liver function test</b>                  |                          |                  |                           | NS                         | NS                         | NS                     | NS                    | NS                       | NS                    | NS              | NS                     | NS               | NS                  | NS                  |
| <b><i>Stool tests</i></b>                   |                          |                  |                           |                            |                            |                        |                       |                          |                       |                 |                        |                  |                     |                     |
| <b><i>Testing for viruses</i></b>           |                          |                  |                           |                            |                            |                        |                       |                          |                       |                 |                        |                  |                     |                     |
| <b>Rotavirus</b>                            |                          | NS               | NS                        | NS                         | NS                         | NS                     | NS                    |                          |                       |                 |                        |                  |                     | NS                  |
| <b>Norovirus</b>                            |                          | NS               |                           | NS                         | NS                         | 11                     | NS                    |                          |                       |                 |                        |                  | *                   | NS                  |
| <b>Adenovirus</b>                           |                          |                  | NS                        | NS                         | NS                         | NS                     | NS                    |                          |                       |                 |                        |                  | 12**                | NS                  |
| <b>Astrovirus</b>                           |                          | NS               | NS                        | NS                         | NS                         | NS                     | NS                    | NS                       | NS                    |                 |                        |                  |                     | NS                  |
| <b>Sapovirus</b>                            |                          | NS               | NS                        | NS                         | NS                         | NS                     | NS                    | NS                       | NS                    |                 |                        |                  |                     | NS                  |
| <b>Enterovirus</b>                          |                          |                  | NS                        | NS                         | NS                         | NS                     | NS                    | NS                       | NS                    | NS              | NS                     |                  |                     | NS                  |
| <b>Poliovirus</b>                           |                          | NS               | NS                        | NS                         | NS                         | NS                     | NS                    | NS                       | NS                    | NS              | NS                     |                  | NS                  | NS                  |
| <b>Aichi virus</b>                          |                          | NS               | NS                        | NS                         | NS                         | NS                     | NS                    | NS                       | NS                    | NS              | NS                     |                  | NS                  | NS                  |

|    |                                                            | [Barber<br>io et<br>al.] | [Hvas<br>et al.] | [Jitsum<br>ura et<br>al.] | [Kach<br>liková<br>et al.] | [Wier<br>zbick<br>a et<br>al.] | [McCu<br>ne et<br>al.] | [Now<br>ak et<br>al.] | [Reig<br>adas<br>et al.] | [Reig<br>adas<br>et al.] | [Rode et<br>al.] | [Rossen<br>et al.] | Sokol<br>et al.] | [Terrveer<br>et al.] | [Brezina et<br>al.] |
|----|------------------------------------------------------------|--------------------------|------------------|---------------------------|----------------------------|--------------------------------|------------------------|-----------------------|--------------------------|--------------------------|------------------|--------------------|------------------|----------------------|---------------------|
| NS | <b>Parechovirus</b>                                        |                          |                  |                           |                            |                                |                        |                       |                          |                          |                  |                    |                  |                      |                     |
| NS | <b>Hepatitis A</b>                                         | NS                       |                  |                           |                            |                                |                        |                       |                          |                          |                  |                    |                  |                      |                     |
|    | <b>Testing for bacteria</b>                                |                          |                  |                           |                            |                                |                        |                       |                          |                          |                  |                    |                  |                      |                     |
| NS | <b>Salmonella spp</b>                                      |                          |                  |                           |                            |                                | 13                     |                       |                          |                          |                  | NS                 |                  |                      |                     |
| NS | <b>Shigella spp</b>                                        |                          |                  |                           | NS                         |                                | 14                     |                       |                          |                          |                  | NS                 |                  |                      |                     |
|    | <b>Yersinia spp</b>                                        |                          |                  |                           | NS                         |                                | NS                     | NS                    |                          |                          |                  | NS                 |                  |                      |                     |
| NS | <b>Campylobacter spp</b>                                   |                          |                  | NS                        |                            |                                | 15                     |                       |                          |                          |                  | NS                 |                  |                      |                     |
|    | <b>Vibrio species</b>                                      | NS                       | NS               | NS                        | NS                         | NS                             | NS                     | NS                    |                          |                          | NS               | NS                 |                  |                      | NS                  |
| NS | <b>C. difficile</b>                                        |                          |                  | NS                        | 16                         |                                | 16a                    |                       |                          |                          | NS               | NS                 |                  |                      |                     |
| NS | <b>H. pylori</b>                                           | NS                       | NS               | NS                        |                            |                                | 17                     | NS                    |                          |                          |                  | NS                 | NS               |                      |                     |
|    | <b>Aeromonas spp.,</b>                                     | NS                       | NS               | NS                        | NS                         | NS                             | NS                     | NS                    | NS                       | NS                       | NS               | NS                 | NS               |                      | NS                  |
|    |                                                            |                          |                  |                           |                            |                                |                        |                       |                          |                          |                  |                    |                  |                      |                     |
| NS | <b>E. coli 0157 (Shiga toxin-producing E. coli (STEC))</b> |                          | NS               |                           | NS                         | NS                             |                        | NS                    |                          |                          |                  | NS                 | NS               |                      | NS                  |
| NS | <b>Enteropathogenic E. coli (EPEC)</b>                     | NS                       | NS               | NS                        | NS                         | NS                             | NS                     | NS                    | NS                       | NS                       |                  | NS                 | NS               | NS                   | NS                  |

| [Brezina et al.] |                                                                | [Barberio et al.] | [Hvas et al.] | [Jitsumura et al.] | [Kachliková et al.] | [Wierzbicka et al.] | [McCune et al.] | Nowk et al.] | [Reigadas et al.] | [Reigadas et al.] | Rode et al.] | [Rossen et al.] | Sokol et al.] | [Terveer et al.] |
|------------------|----------------------------------------------------------------|-------------------|---------------|--------------------|---------------------|---------------------|-----------------|--------------|-------------------|-------------------|--------------|-----------------|---------------|------------------|
|                  | <b>Enterotoxigenic <i>E. coli</i> (ETEC)</b>                   | NS                | NS            | NS                 | NS                  | NS                  | NS              | NS           | NS                | NS                |              | NS              | NS            | NS               |
| NS               | <b>Enteroinvasive <i>E. coli</i> (EIEC)</b>                    |                   |               | NS                 | NS                  | NS                  | NS              | NS           | NS                | NS                |              | NS              | NS            | NS               |
| NS               | <b>Attaching and Effacing <i>E. coli</i> (A/EEC)</b>           | NS                | NS            | NS                 | NS                  | NS                  | NS              | NS           | NS                | NS                | NS           |                 | NS            | NS               |
| NS               | <b>Verotoxin-producing <i>E. coli</i></b>                      | NS                | NS            | NS                 | NS                  | NS                  | NS              | NS           | NS                | NS                | NS           | NS              |               | NS               |
| NS               | <b>MDR Bacteria</b>                                            |                   |               |                    |                     |                     |                 |              |                   |                   |              |                 |               |                  |
| NS               | <b>ESBL producing enterobacterae (Enrichment culture)</b>      |                   |               | NS                 | NS                  |                     | 18              | NS           |                   |                   |              | NS              |               |                  |
| NS               | <b>VRE</b>                                                     |                   |               |                    | NS                  |                     |                 |              |                   |                   |              | NS              |               |                  |
| NS               | <b>CPE (CRE/KPC/NDM,OXA 48)</b>                                |                   | #             | ##                 | NS                  | ###                 | 19              | #            |                   |                   |              | NS              |               |                  |
|                  | <b>MRSA</b>                                                    | NS                | NS            |                    | NS                  |                     | NS              | NS           |                   |                   | NS           | NS              | NS            |                  |
|                  | <b>MDR <i>A. baumannii</i></b>                                 | NS                | NS            | NS                 | NS                  | NS                  | NS              | NS           | NS                | NS                | NS           | NS              |               | NS               |
| NS               | <b>aminoglycoside and quinolone resistant Enterobacterales</b> | NS                | NS            | NS                 | NS                  | NS                  | NS              | NS           | NS                | NS                | NS           | NS              | NS            |                  |



<sup>1</sup>IgM immunoassay; <sup>1a</sup>Total antibody; <sup>2</sup>Hepatitis B surface antigen test; <sup>2a</sup>Hepatitis B core antigen test; <sup>2b</sup>Nucleic acid amplification test; <sup>3</sup>Anti hepatitis C immunoassay; <sup>3a</sup>Nucleic acid amplification test; <sup>4</sup>IgM immunoassay; <sup>5</sup>4<sup>th</sup> generation immunoassay; <sup>5a</sup>Nucleic acid amplification test; <sup>6</sup>HTCV I and II antibodies; <sup>7</sup>Wassermann's reaction; <sup>7a</sup>Rapid plasma regain test; <sup>8,9,10</sup>antibody test; <sup>11</sup>PCR; <sup>12</sup>Adenovirus 40/41/52

|                                                            | [Barberio et al.] | [Hvas et al.] | [Jitsumura et al.] | [Kachliková et al.] | [Wierzbička et al.] | [McCune et al.] | [Nowak et al.] | [Reigadas et al.] | [Reigadas et al.] | Rode et al.] | [Rossen et al.] | Sokol et al.] | [Tervveer et al.] |
|------------------------------------------------------------|-------------------|---------------|--------------------|---------------------|---------------------|-----------------|----------------|-------------------|-------------------|--------------|-----------------|---------------|-------------------|
| <b>Testing for parasites</b>                               |                   |               |                    |                     |                     |                 |                |                   |                   |              |                 |               |                   |
| <b>Cyclospora</b>                                          |                   |               | NS                 | NS                  | NS                  | NS              | NS             | NS                | NS                | NS           | NS              |               |                   |
| <b>Isospora</b>                                            | NS                | NS            | NS                 | NS                  | NS                  | NS              | NS             | NS                | NS                | NS           | NS              |               | NS                |
| <b>Giardia spp</b>                                         |                   |               | 20                 |                     | NS                  | 20a             | NS             | NS                | NS                |              |                 |               |                   |
| <b>Cryptosporidium spp</b>                                 | NS                | NS            | 21                 |                     | NS                  | 21a             | NS             | NS                | NS                |              |                 |               |                   |
| <b>Strongyloides</b>                                       | NS                | NS            | NS                 | NS                  | NS                  | NS              | NS             | NS                | NS                | NS           | 22              |               |                   |
| <b>Cystoisospora belli</b>                                 | NS                | NS            | NS                 | NS                  | NS                  | NS              | NS             | NS                | NS                | NS           | NS              | NS            |                   |
| <b>Microsporidium spp,</b>                                 | NS                | NS            | NS                 | NS                  | NS                  | NS              | NS             | NS                | NS                | NS           | NS              | NS            |                   |
| <b>Entamoeba histolytica</b>                               | NS                |               | NS                 |                     | NS                  | NS              | NS             | NS                | NS                |              | 23              |               |                   |
| <b>Protozoa and helminths</b>                              | NS                | NS            |                    |                     | NS                  | NS              | NS             | NS                | NS                | NS           | NS              | NS            | NS                |
| <b>Other tests</b>                                         |                   |               |                    |                     |                     |                 |                |                   |                   |              |                 |               |                   |
| <b>Fecal occult blood testing</b>                          | NS                | NS            | NS                 | NS                  | NS                  | NS              | NS             | NS                | NS                | NS           | NS              | NS            | NS                |
| <b>Calprotectin</b>                                        | NS                | NS            | NS                 | NS                  | NS                  | NS              | NS             | NS                | NS                | NS           | NS              | NS            | NS                |
| <b>light microscopy for the presence of ova, cysts and</b> |                   |               | NS                 | NS                  |                     |                 | NS             |                   |                   | NS           |                 | NS            |                   |

multiplex PCR; <sup>13,14,15</sup>Culture; <sup>16</sup>Presence of toxins and antigens; <sup>16a</sup>Culture and PCR; <sup>17</sup>Stool antigen test; <sup>18</sup>Enrichment culture; <sup>19</sup>Selective chromogenic culture; <sup>20</sup>Fecal Giardia antigen; <sup>20a</sup>Enzyme immunoassay; <sup>21</sup>Antigen and/or acid fast staining; <sup>21a</sup>Enzyme immunoassay; <sup>22</sup>Strongyloides ELISA; <sup>23</sup>Antibody test  
#CRE alone; ##NDM alone; ###NDM, KPC and OXA48 all three genes; POS:Prospective observational cohort study; CoS: Cohort study; CT: Clinical Trial

Footnote:

Barberio B, Facchin S, Mele E, et al. Faecal microbiota transplantation in *Clostridioides difficile* infection: Real-life experience from an academic Italian hospital. *Thera Adv in Gastroentero* 2020; 13, 175628482093431. <https://doi.org/10.1177/1756284820934315>

Hvas CL, Dahl Jørgensen SM, Jørgensen SP et al. Fecal Microbiota Transplantation Is Superior to Fidaxomicin for Treatment of Recurrent *Clostridium difficile* Infection. *Gastroenterology*. 2019 Apr;156(5):1324-1332.e3. doi: 10.1053/j.gastro.2018.12.01

Jitsumura M, Cunningham AL, Hitchings MD, et al. Protocol for faecal microbiota transplantation in ulcerative colitis (FMTUC): A randomised feasibility study. *BMJ Open* 2018;8. doi:10.1136/bmjopen-2018-021987

Kachlíková M, Sabaka P, Koščálová A, et al. Comorbid status and the faecal microbial transplantation failure in treatment of recurrent *clostridioides difficile* infection – pilot prospective observational cohort study. *BMC Infec Dis* 2020;20. doi:10.1186/s12879-020-4773-x

Mańkowska-Wierzbicka D, Stelmach-Mardas M, Gabryel M, et al. The effectiveness of multi-session FMT treatment in active ulcerative colitis patients: A pilot study. *Biomed* 2020;8:268. doi:10.3390/biomedicines8080268

McCune VL, Quraishi MN, Manzoor S, et al. Results from the first English stool bank using faecal microbiota transplant as a medicinal product for the treatment of *Clostridioides difficile* infection. *EClin Med* 2020;20:100301. doi:10.1016/j.eclinm.2020.100301

Nowak A, Hedenstierna M, Ursing J, et al. Efficacy of routine fecal microbiota transplantation for treatment of recurrent *clostridium difficile* infection: A retrospective cohort study. *Inter J Micro* 2019;2019:1–7. doi:10.1155/2019/7395127

Reigadas E, Bouza E, Olmedo M, et al. Faecal microbiota transplantation for recurrent *clostridioides difficile* infection: Experience with lyophilized oral capsules. *J Hosp Inf* 2020;105:319–24. doi:10.1016/j.jhin.2019.12.022

Reigadas E, Olmedo M, Valerio M, Vázquez-Cuesta, S, et al.. Fecal microbiota transplantation for recurrent *Clostridium difficile* infection: Experience, protocol, and results. *Official J for Spanish Society of Chemotherapy*. 2018;31: 411-418.

Rode AA, Bytzer P, Pedersen OB, et al. Establishing a donor stool bank for faecal microbiota transplantation: Methods and feasibility. *Euro J Clin Micro & Infec Dis* 2019;38:1837–47. doi:10.1007/s10096-019-03615-x

Rossen NG, Fuentes S, van der Spek MJ, et al. Findings from a randomized controlled trial of fecal transplantation for patients with ulcerative colitis. *Gastroentero* 2015;149. doi:10.1053/j.gastro.2015.03.045

Sokol H, Landman C, Seksik P, et al. Fecal microbiota transplantation to maintain remission in crohn's disease: A pilot randomized controlled study. *Microbiome* 2020;8. doi:10.1186/s40168-020-0792-5

Terveer EM, Vendrik KEW, Ooijselaar RE, et al. Faecal microbiota transplantation for clostridioides difficile infection: Four years' experience of the Netherlands donor feces bank. *Un Europ Gastroentero JI* 2020;8:1236–47. doi:10.1177/2050640620957765

Březina J, Bajer L, Wohl P, et al. Fecal microbial transplantation versus mesalamine enema for treatment of active left-sided ulcerative colitis—results of a randomized controlled trial. *J ClinMed* 2021;10:2753. doi:10.3390/jcm10132753

Supplementary Table 6: WHO Western-Pacific region

|                     | Western Pacific region |                |                  |                   |              |                |             |              |              | African region | Eastern Mediterranean region |
|---------------------|------------------------|----------------|------------------|-------------------|--------------|----------------|-------------|--------------|--------------|----------------|------------------------------|
|                     | [Cui et al.]           | [Bamba et al.] | [Chauhan et al.] | [Costello et al.] | [Yau et al.] | [Zhang et al.] | [He et al.] | [Lui et al.] | [Ren et al.] | [Lee et al.]   | [Azimirad et al.]            |
| Time period         | 2012-2014              | 2013-2017      | 2014-2019        | 2013-2016         | 2017-2019    | 2012-2014      | 2012-2014   | 2013-2018    | NS           | 2018-2019      | 2012-2016                    |
| Type of Study       | OS                     | CS             | CS               | RCT               | CoS          | CS             | CS          | RS           | CoS          | CS             | CS                           |
| Country             | China                  | Japan          | Australia        | Australia         | Hong Kong    | China          | China       | Hong Kong    | China        | South Africa   | Iran                         |
| Donor               | R                      | R-UR           | R                | UR                | UR           | UR             | UR          | NS           | UR           | R              |                              |
| GI disorder         | UC                     | Cd             | Cd               | UC                | NS           | Cd             | UC          | Cd           | UC           |                |                              |
| Blood Tests         |                        |                |                  |                   |              |                |             |              |              |                |                              |
| Testing for viruses |                        |                |                  |                   |              |                |             |              |              |                |                              |
| Hepatitis A         |                        |                | 1                |                   |              | 1a             | 1a          | 1a           |              |                |                              |
| Hepatitis B         |                        |                | 2, 2a, 2b        | 2c                |              | 2, 2a, 2b      | 2, 2a, 2b   | 2, 2a        |              |                |                              |
| Hepatitis C         |                        |                | 3                | 3a                |              | 3              | 3           | 3            |              | NS             |                              |
| Hepatitis E         | NS                     | NS             | NS               | NS                |              | NS             | NS          | 4            |              | NS             | NS                           |

|                                      |    |    |    |    |    |    |    |    |    |    |    |
|--------------------------------------|----|----|----|----|----|----|----|----|----|----|----|
| HIV I and II                         |    |    | 5  |    |    |    |    |    |    |    |    |
| Human T-cell lymphoma virus antibody | NS | NS | 6  |    |    | NS | NS |    | NS | NS | NS |
| Cytomegalovirus (CMV)                | NS | NS | 7  |    | NS | NS | NS | NS |    | NS | NS |
| Epstein-Barr virus                   | NS | NS | 8  |    | NS | NS | NS | NS |    | NS | NS |
| Rotavirus                            | NS |    | NS | NS |
| Testing for bacteria                 |    |    |    |    |    |    |    |    |    |    |    |
| Helicobacter pylori                  |    | NS | 9  |    |    | NS | NS | NS | NS | NS | NS |
| Treponema pallidum (Syphilis)        |    | NS | 10 | NS |    |    |    | NS | NS | NS | NS |
| Testing for parasites                |    |    |    |    |    |    |    |    |    |    |    |
| Entamoeba histolytica                | NS | NS | NS |    | NS | NS | NS |    | NS | NS | NS |
| Dirofilaria immitis                  | NS |    | NS |
| Toxocara canis                       | NS |    | NS |
| Ascaris suum                         | NS |    | NS |
| Anisakis                             | NS |    | NS |
| Gnathostoma                          | NS |    | NS |
| Strongyloides stercoralis            | NS |    | 11 |    | NS |

|                                      |    |    |    |    |    |    |    |    |    |    |    |
|--------------------------------------|----|----|----|----|----|----|----|----|----|----|----|
| <i>Paragonimus</i>                   | NS |    | NS |
| <i>westermanii</i>                   | NS |    | NS |
| <i>Paragonimus miyazakii</i>         | NS |    | NS |
| <i>Fasciola spp.,</i>                | NS |    | NS |
| <i>Sparganosis mansoni,</i>          | NS |    | NS |
| <i>Cysticercus cellulosae</i>        | NS |    | NS |
| Other tests                          |    |    |    |    |    |    |    |    |    |    |    |
| Complete blood count                 |    | NS | NS |    |    |    |    |    | NS |    | NS |
| Fasting lipid and blood sugar levels | NS | NS | NS |    |    | NS | NS | NS | NS | NS | NS |
| C-reactive protein (CRP)             |    | NS | NS |    |    |    |    |    | NS |    | NS |
| Erythrocyte sedimentation rate (ESR) |    | NS | NS |    |    |    |    |    | NS |    | NS |
| Renal function test                  | NS | NS | NS |    | NS |
| Liver function test                  | NS | NS | NS |    | NS |
| Stool tests                          |    |    |    |    |    |    |    |    |    |    |    |
| Testing for viruses                  |    |    |    |    |    |    |    |    |    |    |    |
| Norovirus                            | NS |    | NS | NS | NS |

|                                                   |    |    |    |    |    |    |    |     |    |    |    |
|---------------------------------------------------|----|----|----|----|----|----|----|-----|----|----|----|
| Rotavirus                                         | NS |     | NS | NS | NS |
| Testing for bacteria                              |    |    |    |    |    |    |    |     |    |    |    |
| Salmonella spp                                    | NS |    | NS | NS | NS | NS | NS |     | NS |    | NS |
| Shigella spp                                      | NS |    | NS | NS | NS | NS | NS |     | NS |    | NS |
| Yersinia spp                                      | NS  | NS |    | NS |
| Campylobacter spp                                 | NS |    | NS | NS | NS | NS | NS |     | NS |    | NS |
| Vibrio species                                    | NS |    | NS | NS | NS | NS | NS |     | NS | NS | NS |
| C. difficile                                      | NS |    | 12 |    | NS | NS | NS | 12a | NS | NS |    |
| E. coli 0157 (Shiga like toxin-producing E. coli) | NS |    |    |    | NS | NS | NS |     | NS | NS |    |
| MDR Bacteria                                      |    |    |    |    |    |    |    |     |    |    |    |
| VRE                                               | NS |    |    | NS |    | NS | NS |     | NS | NS | NS |
| CPE                                               | NS |    |    | NS |    | NS | NS | NS  | NS | NS | NS |
| CRE                                               | NS | NS | NS | NS |    | NS | NS |     | NS | NS | NS |
| MRSA                                              | NS | NS | NS | NS |    | NS | NS |     | NS | NS | NS |
| MDR Acinetobacter                                 | NS | NS | NS | NS |    | NS | NS |     | NS | NS | NS |
| H. pylori                                         | NS | NS | NS | NS |    | NS | NS | 13  | NS | NS | NS |
| Testing for parasites                             |    |    |    |    |    |    |    |     |    |    |    |
| Clonorchis sinensis                               | NS | NS | NS | NS |    | NS | NS |     | NS | NS | NS |
| Cryptosporidium parvum                            | NS | NS | NS |    |    | NS | NS |     | NS | NS | NS |

|                              |    |    |    |    |    |    |    |    |    |    |    |                         |
|------------------------------|----|----|----|----|----|----|----|----|----|----|----|-------------------------|
| <i>Giardia lamblia</i>       | NS | NS |    |    |    | NS | NS |    | NS | NS | NS | <sup>1</sup> total      |
| <i>Entamoeba histolytica</i> | NS | NS | NS |    |    | NS | NS |    | NS | NS | NS | antibody                |
| <i>Microsporidia,</i>        | NS | NS | NS | NS |    | NS | NS |    | NS | NS | NS | test (IgM               |
| <i>Cyclospora</i>            | NS | NS | NS | NS |    | NS | NS |    | NS | NS | NS | and                     |
| <i>Isospora</i>              | NS | NS | NS | NS |    | NS | NS |    | NS | NS | NS | IgG); <sup>1a</sup> HAV |
| <i>blastocystis</i>          | NS | NS |    | NS | IgM; <sup>2</sup>       |
| <i>dientamoeba</i>           | NS | NS |    | NS | hepatitis B             |
| Other tests                  |    |    |    |    |    |    |    |    |    |    |    | surface                 |
| fragilis and entamoeba       | NS | NS | NS |    | NS | antigen;                |
| histolytica PCR              |    |    |    |    |    |    |    |    |    |    |    | <sup>2a</sup> antibody  |
| light microscopy for the     |    |    |    |    |    |    |    |    |    |    |    | to hepatitis            |
| presence of ova, cysts,      |    |    |    |    |    |    |    |    |    |    |    | B core                  |
| and parasites                |    |    |    |    |    |    |    |    |    |    |    | antigen;                |
|                              |    |    |    |    |    |    |    |    |    |    |    | <sup>2b</sup> total     |

antibody test; <sup>2c</sup>PCR; <sup>3</sup>antibody; <sup>3a</sup>PCR; <sup>4</sup>HAE IgM; <sup>5</sup>HIV Elisa; <sup>6</sup>HTLV antibody; <sup>7</sup>CMV IgM, IgG; <sup>8</sup>EBV IgM, IgG; <sup>9</sup>*H. pylori* serology; <sup>10</sup>Syphilis rapid plasma regain test; <sup>11</sup>Strongyloides serology; <sup>12</sup>toxins A and B by EIA; <sup>12a</sup>Glutamate dehydrogenase gene + polymerase chain reaction; <sup>13</sup>Anti-*H. pylori* IgG; <sup>47</sup>antigen; <sup>48</sup>Fecal Giardia antigen; <sup>51</sup>Acid-fast stain for *Cyclospora*; <sup>52</sup>Acid-fast stain for *Isospora*

OS: Observational study; CS: Case series study; RCT: Randomized Control study; CoS: Cohort Study; UC: Ulcerative Colitis; R: Resistance; UR: Un-related; NS: Not Stated

Footnote:

Cui B, Li P, Xu L, et al. Step-up fecal microbiota transplantation strategy: A pilot study for steroid-dependent ulcerative colitis. J Transla Med 2015;13. doi:10.1186/s12967-015-0646-2



Bamba S, Nishida A, Imaeda H, et al. Successful treatment by fecal microbiota transplantation for Japanese patients with refractory clostridium difficile infection: A prospective case series. *J Microy, Immuno and Infec* 2019;52:663–6. doi:10.1016/j.jmii.2017.08.027

Chauhan A, Apostolov R, Langenberg D, et al. Faecal microbiota transplantation for recurrent clostridioides difficile infection: An Australian experience – effective, safe, yet room for improvement. *Intern Med J* 2021;51:106–10. doi:10.1111/imj.15162

Costello SP, Hughes PA, Waters O, et al. Effect of fecal microbiota transplantation on 8-week remission in patients with ulcerative colitis. *JAMA* 2019;321:156. doi:10.1001/jama.2018.20046

Yau YK, Mak WY, Lui NS, et al. High prevalence of extended-spectrum beta-lactamase organisms and the Covid-19 pandemic impact on donor recruitment for fecal microbiota transplantation in Hong Kong. *Uni Europ Gastro Journal* 2021;9:1027–38. doi:10.1002/ueg2.12160

Zhang S, Chen Q, Kelly CR, et al. Donor screening for fecal microbiota transplantation in China: Evaluation of 8483 candidates. *Gastroentero* 2022;162. doi:10.1053/j.gastro.2021.11.004

He J, He X, Ma Y, et al. A comprehensive approach to stool donor screening for faecal microbiota transplantation in China. *Micro Cell Facto* 2021;20. doi:10.1186/s12934-021-01705-0

Lui RN, Wong SH, Lau LHS, et al. Faecal microbiota transplantation for treatment of recurrent or refractory Clostridioides difficile infection in Hong Kong. *Hong Kong Med JI* Published 2019. doi:10.12809/hkmj197855

Ren R, Gao X, Shi Y, et al. Long-term efficacy of low-intensity single donor fecal microbiota transplantation in ulcerative colitis and outcome-specific gut bacteria. *Front in Micro*2021;12. doi:10.3389/fmicb.2021.742255

Lee S, Drennan K, Simons G, Hepple A, Karlsson K, Lowman W, Gaylard PC, McNamara L, Fabian J. The ‘ins and outs’ of faecal microbiota transplant for recurrent clostridium difficile diarrhoea at wits donald gordon medical centre, Johannesburg, South Africa. *South Afr Medl J* 2018; 108:403.

Azimirad M, Yadegar A, Gholami F, Shahrokh S, et al.. treatment of recurrent clostridioides difficile infection using fecal microbiota transplantation in Iranian patients with underlying inflammatory bowel disease. *J Inflamm Resh* 2020; Volume 13:563–70.



Appendix 1

JBI critical appraisal checklist for randomized clinical trials

|                  | 1 | 2 | 3 | 4 | 5 | 6 | 7 | 8 | 9 | 10 | 11 | 12 | 13 | Overall appraisal |
|------------------|---|---|---|---|---|---|---|---|---|----|----|----|----|-------------------|
| Jiang et al.     |   |   |   |   |   |   |   |   |   |    |    |    |    | Include           |
| Dubberke et al.  |   |   |   |   |   |   |   |   |   |    |    |    |    | Include           |
| González et al.  |   |   |   |   |   |   |   |   |   |    |    |    |    | Include           |
| Hvas et al.      |   |   |   |   |   |   |   |   |   |    |    |    |    | Include           |
| Jitsumura et al. |   |   |   |   |   |   |   |   |   |    |    |    |    | Include           |
| Rossen et al.    |   |   |   |   |   |   |   |   |   |    |    |    |    | Include           |
| Sokol et al.     |   |   |   |   |   |   |   |   |   |    |    |    |    | Include           |
| Brezina et al.   |   |   |   |   |   |   |   |   |   |    |    |    |    | Include           |
| Costello et al.  |   |   |   |   |   |   |   |   |   |    |    |    |    | Include           |

1: Was true randomization used for the assignment of participants to treatment groups?; 2: Was allocation to treatment groups concealed?; 3: Were treatment groups similar at the baseline?; 4: Were participants blind to treatment assignment?; 5: Were those delivering treatment blind to treatment assignment?; 6: Were outcomes assessors blind to treatment assignment?; 7: Were treatment groups treated identically other than the intervention of interest?; 8: Was follow-up complete and if not, were differences between groups in terms of their follow-up adequately described and analyzed?; 9: Were participants analyzed in the groups to which they were randomized?; 10: Were outcomes measured in the same way for treatment groups?; 11: Were outcomes measured in a reliable way?; 12: Was appropriate statistical analysis used?; 13: Was the trial design appropriate, and were any deviations from the standard RCT design (individual randomization, parallel groups) accounted for in the conduct and analysis of the trial?

Following the criteria

Not following the criteria

JBI critical appraisal checklist for case series

|                   | 1 | 2 | 3 | 4 | 5 | 6 | 7 | 8 | 9 | 10 | Overall appraisal |
|-------------------|---|---|---|---|---|---|---|---|---|----|-------------------|
| Aas et al.        |   |   |   |   |   |   |   |   |   |    | Include           |
| Walton et al.     |   |   |   |   |   |   |   |   |   |    | Include           |
| Bamba et al.      |   |   |   |   |   |   |   |   |   |    | Include           |
| Chauhan et al.    |   |   |   |   |   |   |   |   |   |    | Include           |
| Zhang et al.      |   |   |   |   |   |   |   |   |   |    | Include           |
| He et al.         |   |   |   |   |   |   |   |   |   |    | Include           |
| Lee et al.        |   |   |   |   |   |   |   |   |   |    | Include           |
| Azimirad et al.   |   |   |   |   |   |   |   |   |   |    | Include           |
| Staley et al.     |   |   |   |   |   |   |   |   |   |    | Include           |
| Wierzbicka et al. |   |   |   |   |   |   |   |   |   |    | Include           |
| McCune et al.     |   |   |   |   |   |   |   |   |   |    | Include           |
| Reigadas et al.   |   |   |   |   |   |   |   |   |   |    | Include           |
| Reigadas et al.   |   |   |   |   |   |   |   |   |   |    | Include           |
| Rode et al.       |   |   |   |   |   |   |   |   |   |    | Include           |

1: Were there clear criteria for inclusion in the case series?; 2: Was the condition measured in a standard, reliable way for all participants included in the case series?; 3: Were valid methods used for identification of the condition for all participants included in the case series?; 4: Did the case series have consecutive inclusion of participants?; 5: Did the case series have complete inclusion of participants?; 6: Was there clear reporting of the demographics of the participants in the study?; 7: Was there clear reporting of clinical information of the participants?; 8: Were the outcomes or follow-up results of cases clearly reported?; 9: Was there clear reporting of the presenting site(s)/clinic(s) demographic information?; 10: Was statistical analysis appropriate?

Following the criteria

Not following the criteria

Unclear

**JBI critical appraisal checklist for cohort series**

|                   | 1 | 2 | 3 | 4 | 5 | 6 | 7 | 8 | 9 | 10 | 11 | Overall appraisal |
|-------------------|---|---|---|---|---|---|---|---|---|----|----|-------------------|
| Ren et al.        |   |   |   |   |   |   |   |   |   |    |    | Include           |
| Yau et al.        |   |   |   |   |   |   |   |   |   |    |    | Include           |
| Barberio et al.   |   |   |   |   |   |   |   |   |   |    |    | Include           |
| Kachlíková et al. |   |   |   |   |   |   |   |   |   |    |    | Include           |
| Nowak et al.      |   |   |   |   |   |   |   |   |   |    |    | Include           |

1: Were the two groups similar and recruited from the same population?; 2: Were the exposures measured similarly to assign people to both exposed and unexposed groups?; 3: Was the exposure measured in a valid and reliable way?; 4: Were confounding factors identified?; 5: Were strategies to deal with confounding factors stated?; 6: Were the groups/participants free of the outcome at the start of the study (or at the moment of exposure)?; 7: Were the outcomes measured in a valid and reliable way?; 8: Was the follow-up time reported and sufficient to be long enough for outcomes to occur?; 9: Was follow-up complete, and if not, were the reasons to lose to follow-up described and explored?; 10: Were strategies to address incomplete follow-up utilized?; 11: Was appropriate statistical analysis used?

Following the criteria

Not following the criteria

**JBI critical appraisal checklist for case studies**

|                 | 1 | 2 | 3 | 4 | 5 | 6 | 7 | 8 | Overall appraisal |
|-----------------|---|---|---|---|---|---|---|---|-------------------|
| Espinoza et al. |   |   |   |   |   |   |   |   | Include           |

1: Were patient’s demographic characteristics clearly described?; 2: Was the patient’s history clearly described and presented as a timeline?; 3: Was the current clinical condition of the patient on presentation clearly described?; 4: Were diagnostic tests or assessment methods and the results clearly described?; 5: Was the intervention(s) or treatment procedure(s) clearly described?; 6: Was the post-intervention clinical condition clearly described?; 7: Were adverse events (harms) or unanticipated events identified and described?; 8: Does the case report provide takeaway lessons?

Following the criteria

Not following the criteria
